# Supplementary material for: Targeted profiling of human extrachromosomal DNA by CRISPR-CATCH
Source: PubMed Central journal article supplement (PMC9649439; doi:10.1038/s41588-022-01190-0), 2022-10-17

1. CHEF DNA Size Marker, 0.2–2.2 Mb, *S. cerevisiae* Ladder
2. CHEF DNA Size Marker, 1–3.1 Mb, *H. wingei* Ladder
3. GBM39 no treatment
4. GBM39 guide A
5. GBM39 guide E
6. GBM39 guide E+F
7. Jurkat no treatment
8. Jurkat guide A

Raw image of PFGE agarose gel for CRISPR-CATCH for indicated cell lines. Image was cropped to remove extra white space and ladders, contrast was adjusted to make bands more visible. Lanes 4/6 correspond to purified ecDNA and chromosomal DNA used in **Figure 3**, respectively.

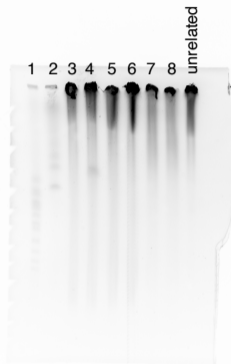

Supplement: 41588_2022_1190_MOESM9_ESM.pdf [file 41588_2022_1190_MOESM9_ESM.pdf]
