# Supplementary material for: Targeted profiling of human extrachromosomal DNA by CRISPR-CATCH
Source: PubMed Central journal article supplement (PMC9649439; doi:10.1038/s41588-022-01190-0), 2022-10-17

1. CHEF DNA Size Marker, 0.2–2.2 Mb, *S. cerevisiae* Ladder
2. CHEF DNA Size Marker, 1–3.1 Mb, *H. wingei* Ladder
3. GBM39 guide A CRISPR-CATCH
4. GBM39 no treatment CRISPR-CATCH
5. GBM39 in-solution HMW DNA isolation, no treatment

Raw image of PFGE agarose gel for CRISPR-CATCH and in-solution HMW DNA as indicated. Image was rotated and cropped to remove extra white space. Corresponds to **Extended Data Figure 1a**.

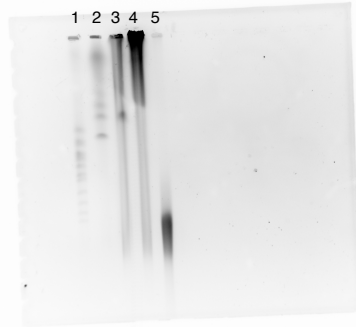

1. CHEF DNA Size Marker, 0.2–2.2 Mb, *S. cerevisiae* Ladder
2. CHEF DNA Size Marker, 1–3.1 Mb, *H. wingei* Ladder
3. GBM39 in-solution HMW DNA isolation, no treatment
4. GBM39 in-solution HMW DNA isolation, exonuclease

Raw image of PFGE agarose gel for in-solution HMW DNA as indicated. Image was cropped to remove extra white space and contrast was increased. Corresponds to **Extended Data Figure 1b**.

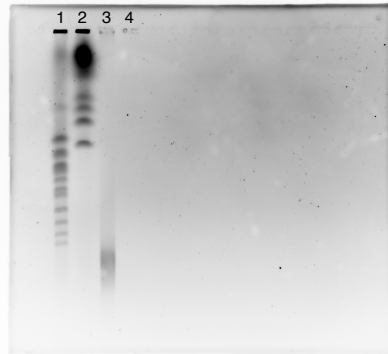

1. CHEF DNA Size Marker, 0.2–2.2 Mb, *S. cerevisiae* Ladder
2. CHEF DNA Size Marker, 1–3.1 Mb, *H. wingei* Ladder
3. no treatment

Raw image of PFGE agarose gel for untreated GBM39 cells. Image was cropped to remove extra white space. Corresponds to **Extended Data Figure 1d**.

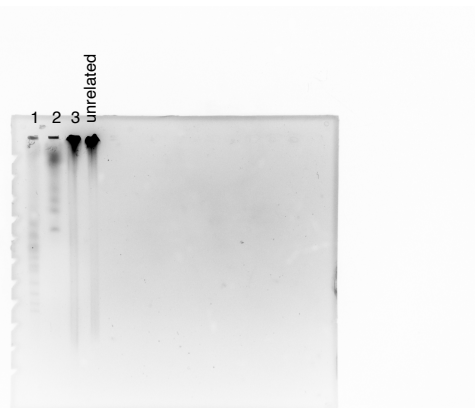

Supplement: 41588_2022_1190_MOESM11_ESM.pdf [file 41588_2022_1190_MOESM11_ESM.pdf]
