# Supplementary material for: Targeted profiling of human extrachromosomal DNA by CRISPR-CATCH
Source: PubMed Central journal article supplement (PMC9649439; doi:10.1038/s41588-022-01190-0), 2022-10-17

1. CHEF DNA Size Marker, 0.2–2.2 Mb, *S. cerevisiae* Ladder
2. CHEF DNA Size Marker, 0.2–2.2 Mb, *S. cerevisiae* Ladder + electrodepletion
3. CHEF DNA Size Marker, 1–3.1 Mb, *H. wingei* Ladder
4. CHEF DNA Size Marker, 1–3.1 Mb, *H. wingei* Ladder + electrodepletion

Raw image of PFGE agarose gel for size markers.  
Image was rotated and cropped to remove extra white space.  
Corresponds to **Extended Data Figure 3a**.

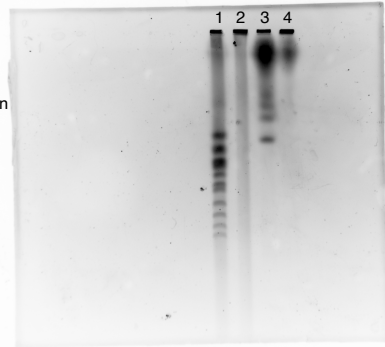

1. CHEF DNA Size Marker, 0.2–2.2 Mb, *S. cerevisiae* Ladder
2. CHEF DNA Size Marker, 1–3.1 Mb, *H. wingei* Ladder
3. SNU16 cells
4. SNU16 cells + electrodepletion
5. SNU16 cells + electrodepletion + guide 17

Raw image of PFGE agarose gel.  
Image was cropped to remove extra white space.  
Corresponds to **Extended Data Figure 3b**.

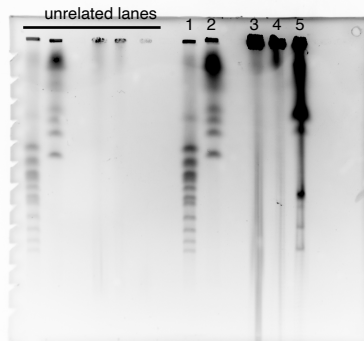

1. CHEF DNA Size Marker, 0.2–2.2 Mb, *S. cerevisiae* Ladder
2. CHEF DNA Size Marker, 1–3.1 Mb, *H. wingei* Ladder
3. melanoma patient Pt9 tumor + guide 194

Raw image of PFGE agarose gel for CRISPR-CATCH.  
Image was cropped to remove extra white space and ladders,  
contrast was increased. Corresponds to **Extended Data Figure 3e**.

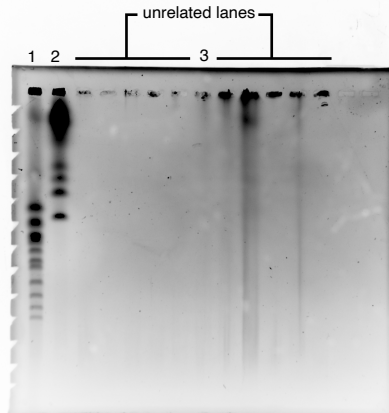

Supplement: 41588_2022_1190_MOESM12_ESM.pdf [file 41588_2022_1190_MOESM12_ESM.pdf]
