# Supplementary material for: Targeted profiling of human extrachromosomal DNA by CRISPR-CATCH
Source: PubMed Central journal article supplement (PMC9649439; doi:10.1038/s41588-022-01190-0), 2022-10-17

1. CHEF DNA Size Marker, 0.2–2.2 Mb, *S. cerevisiae* Ladder
2. CHEF DNA Size Marker, 1–3.1 Mb, *H. wingei* Ladder
3. no treatment
4. guide 17
5. guide 143
6. guide 146
7. guide 149
8. guide 152
9. guide 5
10. guide 155
11. guide 158

Raw image of PFGE agarose gel for CRISPR-CATCH for SNU16 cells. Image was rotated, cropped to remove extra white space and ladders, contrast was adjusted to make bands more visible. Corresponds to **Extended Data Figure 8c**.

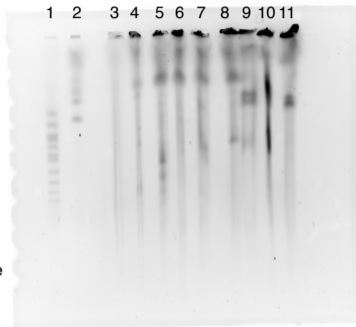

Supplement: 41588_2022_1190_MOESM13_ESM.pdf [file 41588_2022_1190_MOESM13_ESM.pdf]
